# Supplementary material for: The kinetics and product state distributions from gas-phase reactions of small atomic and molecular cations with C2H4, C2H3F, 1,1-C2H2F2, C2HF3and C2F4
Source: Royal Society of Chemistry journal article supplement (doi:10.1039/c3cp54881c), 2014-01-01
Supplement: c3cp54881c.pdf [file c3cp54881c.pdf]

**Supplementary data** : Table showing a comparison of daughter ion branching ratios from photon-induced TPEPICO spectroscopy with bimolecular ion-molecule reactions at twenty five defined recombination energies of the reactant ion.

| hv / eV                                  | C <sub>2</sub> H <sub>4</sub> BRs (t)pepico <sup>a</sup> | BRs ion-molecule reaction <sup>c</sup>                          | C <sub>2</sub> H <sub>3</sub> F BRs (t)pepico <sup>b</sup> | BRs ion-molecule reaction <sup>d</sup>                            | 1,1-C <sub>2</sub> H <sub>2</sub> F <sub>2</sub> BRs (t)pepico <sup>b</sup>     | BRs ion-molecule reaction <sup>d</sup>                                         | C <sub>2</sub> HF <sub>3</sub> BRs (t)pepico <sup>b</sup> | BRs ion-molecule reaction <sup>d</sup>                            | C <sub>2</sub> F <sub>4</sub> BRs (t)pepico <sup>b</sup>        | BRs ion-molecule reaction <sup>e</sup>                           |                                                                |
|------------------------------------------|----------------------------------------------------------|-----------------------------------------------------------------|------------------------------------------------------------|-------------------------------------------------------------------|---------------------------------------------------------------------------------|--------------------------------------------------------------------------------|-----------------------------------------------------------|-------------------------------------------------------------------|-----------------------------------------------------------------|------------------------------------------------------------------|----------------------------------------------------------------|
| <b>21.56 (Ne<sup>+</sup>)</b>            | ca. C <sub>2</sub> H <sub>3</sub> <sup>+</sup> 90        | C <sub>2</sub> H <sub>3</sub> <sup>+</sup> 82                   | C <sub>2</sub> H <sub>2</sub> <sup>+</sup> 41              | C <sub>2</sub> H <sub>2</sub> <sup>+</sup> 60                     | CF <sup>+</sup> 34                                                              | CF <sup>+</sup> 34                                                             | CF <sup>+</sup> 74                                        | CF <sup>+</sup> 60                                                | CF <sup>+</sup> 80 <sup>f</sup>                                 | CF <sup>+</sup> 80                                               |                                                                |
|                                          | C <sub>2</sub> H <sub>2</sub> <sup>+</sup> 10            | C <sub>2</sub> H <sub>4</sub> <sup>+</sup> (P <sup>+</sup> ) 18 | C <sub>2</sub> HF <sup>+</sup> 33                          | C <sub>2</sub> HF <sup>+</sup> 13                                 | C <sub>2</sub> HF <sup>+</sup> 27                                               | C <sub>2</sub> HF <sup>+</sup> 25                                              | CHF <sup>+</sup> 9                                        | CF <sub>2</sub> =CH <sup>+</sup> 13                               | CF <sub>2</sub> <sup>+</sup> 20 <sup>f</sup>                    | CF <sub>2</sub> <sup>+</sup> 15                                  |                                                                |
|                                          |                                                          |                                                                 | CF <sup>+</sup> 15                                         | CH <sub>2</sub> =CH <sup>+</sup> 11                               | CH <sub>2</sub> <sup>+</sup> 13                                                 | C <sub>2</sub> H <sub>2</sub> <sup>+</sup> 18                                  | C <sub>2</sub> F <sub>2</sub> <sup>+</sup> 7              | CF <sub>2</sub> <sup>+</sup> 11                                   |                                                                 | C <sub>2</sub> F <sub>4</sub> <sup>+</sup> (P <sup>+</sup> ) 4   |                                                                |
|                                          |                                                          |                                                                 | CH <sub>2</sub> =CF <sup>+</sup> 12                        | CF <sup>+</sup> 4                                                 | C <sub>2</sub> H <sub>2</sub> <sup>+</sup> 11                                   | CH <sub>2</sub> <sup>+</sup> 13                                                | CF <sub>2</sub> <sup>+</sup> 5                            | C <sub>2</sub> HF <sup>+</sup> 7                                  |                                                                 | CF <sub>3</sub> <sup>+</sup> 1                                   |                                                                |
|                                          |                                                          |                                                                 | CHF <sup>+</sup> 5                                         | CHF <sup>+</sup> 4                                                | CF <sub>2</sub> =CH <sup>+</sup> 5                                              | CF=CH <sub>2</sub> <sup>+</sup> 8                                              | CF <sub>2</sub> =CH <sup>+</sup> 5                        | CHF <sup>+</sup> 7                                                |                                                                 |                                                                  |                                                                |
|                                          |                                                          |                                                                 |                                                            | CH <sub>2</sub> =CF <sup>+</sup> 3                                | CF=CH <sub>2</sub> <sup>+</sup> 5                                               | CF <sub>2</sub> <sup>+</sup> 2                                                 |                                                           | CHF <sub>2</sub> <sup>+</sup> 1                                   |                                                                 |                                                                  |                                                                |
|                                          |                                                          |                                                                 |                                                            | C <sub>2</sub> H <sub>3</sub> F <sup>+</sup> (P <sup>+</sup> ) 2  | CF <sub>2</sub> <sup>+</sup> 5                                                  |                                                                                |                                                           | C <sub>2</sub> F <sup>+</sup> 1                                   |                                                                 |                                                                  |                                                                |
|                                          |                                                          |                                                                 |                                                            | C <sub>2</sub> H <sup>+</sup> 2                                   |                                                                                 |                                                                                |                                                           |                                                                   |                                                                 |                                                                  |                                                                |
|                                          |                                                          |                                                                 |                                                            | CH <sub>2</sub> F <sup>+</sup> 1                                  |                                                                                 |                                                                                |                                                           |                                                                   |                                                                 |                                                                  |                                                                |
|                                          |                                                          |                                                                 |                                                            |                                                                   |                                                                                 |                                                                                |                                                           |                                                                   |                                                                 |                                                                  |                                                                |
|                                          |                                                          |                                                                 |                                                            |                                                                   |                                                                                 |                                                                                |                                                           |                                                                   |                                                                 |                                                                  |                                                                |
| <b>17.42 (F<sup>+</sup>)</b>             | C <sub>2</sub> H <sub>3</sub> <sup>+</sup> 85            | C <sub>2</sub> H <sub>3</sub> <sup>+</sup> 66                   | CH <sub>2</sub> =CH <sup>+</sup> 47                        | Reaction not studied                                              | CF=CH <sub>2</sub> <sup>+</sup> 38                                              | CF=CH <sub>2</sub> <sup>+</sup> 45                                             | CF <sub>2</sub> =CH <sup>+</sup> 55                       | Products not identified                                           | C <sub>2</sub> F <sub>3</sub> <sup>+</sup> 50                   | CF <sub>3</sub> <sup>+</sup> 40                                  |                                                                |
|                                          | C <sub>2</sub> H <sub>2</sub> <sup>+</sup> 15            | C <sub>2</sub> H <sub>2</sub> <sup>+</sup> 28                   | CH <sub>2</sub> =CF <sup>+</sup> 24                        |                                                                   | CF <sup>+</sup> 16                                                              | CH <sub>2</sub> F <sup>+</sup> 28                                              | CHF <sup>+</sup> 23                                       |                                                                   | CF <sup>+</sup> 26                                              | CF <sub>2</sub> <sup>+</sup> 38                                  |                                                                |
|                                          |                                                          | C <sub>2</sub> H <sub>4</sub> <sup>+</sup> (P <sup>+</sup> ) 6  | C <sub>2</sub> H <sub>2</sub> <sup>+</sup> 17              |                                                                   | C <sub>2</sub> HF <sup>+</sup> 14                                               | CF <sup>+</sup> 18                                                             | CF <sup>+</sup> 15                                        |                                                                   | CF <sub>2</sub> <sup>+</sup> 24                                 | C <sub>2</sub> F <sub>3</sub> <sup>+</sup> 22                    |                                                                |
|                                          |                                                          |                                                                 | C <sub>2</sub> HF <sup>+</sup> 7                           |                                                                   | CH <sub>2</sub> F <sup>+</sup> 12                                               | CF <sub>2</sub> =CH <sup>+</sup> 5                                             | CHF <sub>2</sub> <sup>+</sup> 7                           |                                                                   |                                                                 |                                                                  |                                                                |
|                                          |                                                          |                                                                 | CF <sup>+</sup> 5                                          |                                                                   | CH <sub>2</sub> <sup>+</sup> 12                                                 | C <sub>2</sub> H <sub>2</sub> F <sub>2</sub> <sup>+</sup> (P <sup>+</sup> ) 4  |                                                           |                                                                   |                                                                 |                                                                  |                                                                |
|                                          |                                                          |                                                                 |                                                            |                                                                   | CF <sub>2</sub> =CH <sup>+</sup> 8                                              |                                                                                |                                                           |                                                                   |                                                                 |                                                                  |                                                                |
| <b>15.76 (Ar<sup>+</sup>)</b>            | C <sub>2</sub> H <sub>3</sub> <sup>+</sup> 80            | C <sub>2</sub> H <sub>3</sub> <sup>+</sup> 76                   | CH <sub>2</sub> =CH <sup>+</sup> 52                        | CH <sub>2</sub> =CH <sup>+</sup> 57                               | CF=CH <sub>2</sub> <sup>+</sup> 35                                              | CF=CH <sub>2</sub> <sup>+</sup> 44                                             | CF <sub>2</sub> =CH <sup>+</sup> 38                       | CHF <sub>2</sub> <sup>+</sup> 51                                  | CF <sub>2</sub> <sup>+</sup> 43                                 | CF <sub>2</sub> <sup>+</sup> 28                                  |                                                                |
|                                          | C <sub>2</sub> H <sub>2</sub> <sup>+</sup> 20            | C <sub>2</sub> H <sub>2</sub> <sup>+</sup> 20                   | CH <sub>2</sub> =CF <sup>+</sup> 22                        | CH <sub>2</sub> =CF <sup>+</sup> 18                               | CH <sub>2</sub> F <sup>+</sup> 28                                               | CH <sub>2</sub> F <sup>+</sup> 22                                              | CHF <sub>2</sub> <sup>+</sup> 26                          | CHF <sup>+</sup> 20                                               | C <sub>2</sub> F <sub>3</sub> <sup>+</sup> 37                   | CF <sub>3</sub> <sup>+</sup> 27                                  |                                                                |
|                                          |                                                          | C <sub>2</sub> H <sub>4</sub> <sup>+</sup> (P <sup>+</sup> ) 4  | C <sub>2</sub> H <sub>2</sub> <sup>+</sup> 12              | C <sub>2</sub> H <sub>2</sub> <sup>+</sup> 12                     | CF <sup>+</sup> 25                                                              | C <sub>2</sub> HF <sup>+</sup> 19                                              | C <sub>2</sub> HF <sup>+</sup> 19                         | CHF <sup>+</sup> 21                                               | CF <sub>2</sub> =CH <sup>+</sup> 13                             | CF <sup>+</sup> 15                                               | C <sub>2</sub> F <sub>3</sub> <sup>+</sup> 24                  |
|                                          |                                                          |                                                                 | C <sub>2</sub> HF <sup>+</sup> 8                           | C <sub>2</sub> HF <sup>+</sup> 7                                  | C <sub>2</sub> HF <sup>+</sup> 11                                               | CF <sup>+</sup> 12                                                             | CF <sup>+</sup> 15                                        | CF <sup>+</sup> 15                                                | CF <sup>+</sup> 8                                               | CF <sub>3</sub> <sup>+</sup> 5                                   | CF <sup>+</sup> 17                                             |
|                                          |                                                          |                                                                 | CF <sup>+</sup> 5                                          | CF <sup>+</sup> 5                                                 | CF <sub>2</sub> =CH <sup>+</sup> 1                                              | C <sub>2</sub> H <sub>2</sub> F <sub>2</sub> <sup>+</sup> (P <sup>+</sup> ) 3  |                                                           |                                                                   | C <sub>2</sub> HF <sub>3</sub> <sup>+</sup> (P <sup>+</sup> ) 4 |                                                                  | C <sub>2</sub> F <sub>4</sub> <sup>+</sup> (P <sup>+</sup> ) 4 |
|                                          |                                                          |                                                                 |                                                            | C <sub>2</sub> H <sub>3</sub> F <sup>+</sup> (P <sup>+</sup> ) 1  |                                                                                 |                                                                                |                                                           |                                                                   | C <sub>2</sub> F <sub>2</sub> <sup>+</sup> 4                    |                                                                  |                                                                |
|                                          |                                                          |                                                                 |                                                            |                                                                   |                                                                                 |                                                                                |                                                           |                                                                   |                                                                 |                                                                  |                                                                |
| <b>15.58 (N<sub>2</sub><sup>+</sup>)</b> | C <sub>2</sub> H <sub>3</sub> <sup>+</sup> 79            | C <sub>2</sub> H <sub>3</sub> <sup>+</sup> 50                   | CH <sub>2</sub> =CH <sup>+</sup> 42                        | CH <sub>2</sub> =CH <sup>+</sup> 40                               | CH <sub>2</sub> F <sup>+</sup> 35                                               | CF=CH <sub>2</sub> <sup>+</sup> 33                                             | CHF <sub>2</sub> <sup>+</sup> 40                          | CHF <sub>2</sub> <sup>+</sup> 66                                  | CF <sub>2</sub> <sup>+</sup> 60                                 | C <sub>2</sub> F <sub>4</sub> <sup>+</sup> (P <sup>+</sup> ) 46  |                                                                |
|                                          | C <sub>2</sub> H <sub>2</sub> <sup>+</sup> 21            | C <sub>2</sub> H <sub>2</sub> <sup>+</sup> 20                   | CH <sub>2</sub> =CF <sup>+</sup> 27                        | CH <sub>2</sub> =CF <sup>+</sup> 29                               | CF <sup>+</sup> 29                                                              | CH <sub>2</sub> F <sup>+</sup> 28                                              | CHF <sup>+</sup> 24                                       | CF <sup>+</sup> 16                                                | CF <sup>+</sup> 26                                              | CF <sup>+</sup> 25                                               |                                                                |
|                                          |                                                          | HNC <sup>+</sup> 10                                             | C <sub>2</sub> H <sub>2</sub> <sup>+</sup> 13              | C <sub>2</sub> H <sub>2</sub> <sup>+</sup> 15                     | CF=CH <sub>2</sub> <sup>+</sup> 23                                              | C <sub>2</sub> HF <sup>+</sup> 20                                              | C <sub>2</sub> HF <sup>+</sup> 20                         | CHF <sup>+</sup> 12                                               | CF <sub>3</sub> <sup>+</sup> 11                                 | CF <sub>3</sub> <sup>+</sup> 13                                  |                                                                |
|                                          |                                                          | HNCH <sup>+</sup> 10                                            | C <sub>2</sub> HF <sup>+</sup> 9                           | C <sub>2</sub> HF <sup>+</sup> 12                                 | C <sub>2</sub> HF <sup>+</sup> 13                                               | CF <sup>+</sup> 11                                                             | CF <sup>+</sup> 11                                        | CF <sub>2</sub> =CH <sup>+</sup> 16                               | C <sub>2</sub> HF <sub>3</sub> <sup>+</sup> (P <sup>+</sup> ) 6 | C <sub>2</sub> F <sub>3</sub> <sup>+</sup> 3                     | CF <sub>2</sub> <sup>+</sup> 11                                |
|                                          |                                                          | N <sub>2</sub> H <sup>+</sup> 10                                | CF <sup>+</sup> 6                                          | C <sub>2</sub> H <sub>3</sub> F <sup>+</sup> (P <sup>+</sup> ) 4  |                                                                                 | C <sub>2</sub> H <sub>2</sub> F <sub>2</sub> <sup>+</sup> (P <sup>+</sup> ) 8  |                                                           |                                                                   |                                                                 |                                                                  | C <sub>2</sub> F <sub>3</sub> <sup>+</sup> 5                   |
|                                          |                                                          |                                                                 |                                                            |                                                                   |                                                                                 |                                                                                |                                                           |                                                                   |                                                                 |                                                                  |                                                                |
| <b>14.53 (N<sup>+</sup>)</b>             | C <sub>2</sub> H <sub>3</sub> <sup>+</sup> 66            | C <sub>2</sub> H <sub>3</sub> <sup>+</sup> 30                   | CH <sub>2</sub> =CF <sup>+</sup> 41                        | C <sub>2</sub> H <sub>3</sub> F <sup>+</sup> (P <sup>+</sup> ) 52 | C <sub>2</sub> HF <sup>+</sup> 52                                               | C <sub>2</sub> H <sub>2</sub> F <sub>2</sub> <sup>+</sup> (P <sup>+</sup> ) 82 | CHF <sub>2</sub> <sup>+</sup> 94                          | C <sub>2</sub> HF <sub>3</sub> <sup>+</sup> (P <sup>+</sup> ) 100 | CF <sup>+</sup> 55                                              | C <sub>2</sub> F <sub>4</sub> <sup>+</sup> (P <sup>+</sup> ) 85  |                                                                |
|                                          | C <sub>2</sub> H <sub>2</sub> <sup>+</sup> 34            | C <sub>2</sub> H <sub>4</sub> <sup>+</sup> (P <sup>+</sup> ) 25 | C <sub>2</sub> H <sub>2</sub> <sup>+</sup> 22              | CH <sub>2</sub> =CF <sup>+</sup> 21                               | CF=CH <sub>2</sub> <sup>+</sup> 48                                              | CF=CH <sub>2</sub> <sup>+</sup> 16                                             | CF <sup>+</sup> 6                                         |                                                                   | CF <sub>3</sub> <sup>+</sup> 37                                 | CF <sup>+</sup> 9                                                |                                                                |
|                                          |                                                          | C <sub>2</sub> H <sub>2</sub> <sup>+</sup> 10                   | CH <sub>2</sub> =CH <sup>+</sup> 20                        | CH <sub>2</sub> =CH <sup>+</sup> 20                               |                                                                                 | C <sub>2</sub> HF <sup>+</sup> 2                                               |                                                           |                                                                   | CF <sub>2</sub> <sup>+</sup> 8                                  | C <sub>2</sub> F <sub>3</sub> <sup>+</sup> 4                     |                                                                |
|                                          |                                                          | HNC <sup>+</sup> 15                                             | C <sub>2</sub> HF <sup>+</sup> 17                          | C <sub>2</sub> HF <sup>+</sup> 6                                  |                                                                                 |                                                                                |                                                           |                                                                   |                                                                 |                                                                  | CF <sub>2</sub> <sup>+</sup> 1                                 |
|                                          |                                                          | HCNH <sup>+</sup> 10                                            |                                                            | C <sub>2</sub> H <sub>2</sub> <sup>+</sup> 1                      |                                                                                 |                                                                                |                                                           |                                                                   |                                                                 |                                                                  | CF <sub>3</sub> <sup>+</sup> 1                                 |
|                                          |                                                          | CH <sub>2</sub> CN <sup>+</sup> 10                              |                                                            |                                                                   |                                                                                 |                                                                                |                                                           |                                                                   |                                                                 |                                                                  |                                                                |
|                                          |                                                          |                                                                 |                                                            |                                                                   |                                                                                 |                                                                                |                                                           |                                                                   |                                                                 |                                                                  |                                                                |
| <b>14.01 (CO<sup>+</sup>)</b>            | C <sub>2</sub> H <sub>3</sub> <sup>+</sup> 52            | No data available                                               | CH <sub>2</sub> =CF <sup>+</sup> 44                        | C <sub>2</sub> H <sub>3</sub> F <sup>+</sup> (P <sup>+</sup> ) 39 | C <sub>2</sub> H <sub>2</sub> F <sub>2</sub> <sup>+</sup> (P <sup>+</sup> ) 100 | C <sub>2</sub> H <sub>2</sub> F <sub>2</sub> <sup>+</sup> (P <sup>+</sup> ) 84 | CHF <sub>2</sub> <sup>+</sup> 100                         | CHF <sub>2</sub> <sup>+</sup> 50                                  | CF <sub>3</sub> <sup>+</sup> 60                                 | C <sub>2</sub> F <sub>4</sub> <sup>+</sup> (P <sup>+</sup> ) 100 |                                                                |
|                                          | C <sub>2</sub> H <sub>2</sub> <sup>+</sup> 48            |                                                                 | C <sub>2</sub> H <sub>2</sub> <sup>+</sup> 37              | C <sub>2</sub> H <sub>2</sub> <sup>+</sup> 27                     |                                                                                 | CF=CH <sub>2</sub> <sup>+</sup> 16                                             |                                                           | C <sub>2</sub> HF <sub>3</sub> <sup>+</sup> (P <sup>+</sup> ) 41  | CF <sup>+</sup> 40                                              |                                                                  |                                                                |
|                                          |                                                          |                                                                 | C <sub>2</sub> HF <sup>+</sup> 13                          | CH <sub>2</sub> =CF <sup>+</sup> 16                               |                                                                                 |                                                                                |                                                           |                                                                   | CF <sup>+</sup> 9                                               |                                                                  |                                                                |
|                                          |                                                          |                                                                 | CH <sub>2</sub> =CH <sup>+</sup> 6                         | CH <sub>2</sub> =CH <sup>+</sup> 16                               |                                                                                 |                                                                                |                                                           |                                                                   |                                                                 |                                                                  |                                                                |

|                                           |                                                                                                |                                                                                                                                                                   |                                                                                                                                                                 |                                                                                                                                                                                                                                     |                                                                                 |                                                                                   |                                                                                                      |                                                                                                      |                                                                                                                         |                                                                               |
|-------------------------------------------|------------------------------------------------------------------------------------------------|-------------------------------------------------------------------------------------------------------------------------------------------------------------------|-----------------------------------------------------------------------------------------------------------------------------------------------------------------|-------------------------------------------------------------------------------------------------------------------------------------------------------------------------------------------------------------------------------------|---------------------------------------------------------------------------------|-----------------------------------------------------------------------------------|------------------------------------------------------------------------------------------------------|------------------------------------------------------------------------------------------------------|-------------------------------------------------------------------------------------------------------------------------|-------------------------------------------------------------------------------|
| <b>14.00 (Kr<sup>+</sup>)</b>             | C <sub>2</sub> H <sub>3</sub> <sup>+</sup> 52<br>C <sub>2</sub> H <sub>2</sub> <sup>+</sup> 48 | C <sub>2</sub> H <sub>3</sub> <sup>+</sup> 45<br>C <sub>2</sub> H <sub>2</sub> <sup>+</sup> 45<br>C <sub>2</sub> H <sub>4</sub> <sup>+</sup> (P <sup>+</sup> ) 10 | CH <sub>2</sub> =CF <sup>+</sup> 43<br>C <sub>2</sub> H <sub>2</sub> <sup>+</sup> 37<br>C <sub>2</sub> HF <sup>+</sup> 13<br>CH <sub>2</sub> =CH <sup>+</sup> 7 | C <sub>2</sub> H <sub>3</sub> F <sup>+</sup> (P <sup>+</sup> ) 39<br>C <sub>2</sub> H <sub>2</sub> <sup>+</sup> 25<br>CH <sub>2</sub> =CF <sup>+</sup> 23<br>C <sub>2</sub> HF <sup>+</sup> 7<br>CH <sub>2</sub> =CH <sup>+</sup> 6 | C <sub>2</sub> H <sub>2</sub> F <sub>2</sub> <sup>+</sup> (P <sup>+</sup> ) 100 | Products not identified                                                           | CHF <sub>2</sub> <sup>+</sup> 100                                                                    | C <sub>2</sub> HF <sub>3</sub> <sup>+</sup> (P <sup>+</sup> ) 86<br>CHF <sub>2</sub> <sup>+</sup> 14 | CF <sub>3</sub> <sup>+</sup> 60<br>CF <sup>+</sup> 40                                                                   | Reaction not studied                                                          |
| <b>13.76 (CO<sub>2</sub><sup>+</sup>)</b> | C <sub>2</sub> H <sub>2</sub> <sup>+</sup> 58<br>C <sub>2</sub> H <sub>3</sub> <sup>+</sup> 42 | No data available                                                                                                                                                 | C <sub>2</sub> H <sub>2</sub> <sup>+</sup> 57<br>CH <sub>2</sub> =CF <sup>+</sup> 36<br>C <sub>2</sub> HF <sup>+</sup> 6                                        | C <sub>2</sub> H <sub>3</sub> F <sup>+</sup> (P <sup>+</sup> ) 90<br>C <sub>2</sub> H <sub>2</sub> <sup>+</sup> 9<br>CH <sub>2</sub> =CH <sup>+</sup> 1                                                                             | C <sub>2</sub> H <sub>2</sub> F <sub>2</sub> <sup>+</sup> (P <sup>+</sup> ) 100 | C <sub>2</sub> H <sub>2</sub> F <sub>2</sub> <sup>+</sup> (P <sup>+</sup> ) 100   | C <sub>2</sub> HF <sub>3</sub> <sup>+</sup> (P <sup>+</sup> ) 80<br>CHF <sub>2</sub> <sup>+</sup> 20 | C <sub>2</sub> HF <sub>3</sub> <sup>+</sup> (P <sup>+</sup> ) 100                                    | CF <sub>3</sub> <sup>+</sup> 80<br>CF <sup>+</sup> 20                                                                   | C <sub>2</sub> F <sub>4</sub> <sup>+</sup> (P <sup>+</sup> ) 100              |
| <b>13.62 (O<sup>+</sup>)</b>              | C <sub>2</sub> H <sub>2</sub> <sup>+</sup> 70<br>C <sub>2</sub> H <sub>3</sub> <sup>+</sup> 30 | C <sub>2</sub> H <sub>2</sub> <sup>+</sup> 80<br>C <sub>2</sub> H <sub>3</sub> <sup>+</sup> 15<br>C <sub>2</sub> H <sub>4</sub> <sup>+</sup> (P <sup>+</sup> ) 5  | C <sub>2</sub> H <sub>2</sub> <sup>+</sup> 45<br>C <sub>2</sub> H <sub>3</sub> F <sup>+</sup> (P <sup>+</sup> ) 38<br>CH <sub>2</sub> =CF <sup>+</sup> 17       | C <sub>2</sub> H <sub>3</sub> F <sup>+</sup> (P <sup>+</sup> ) 100                                                                                                                                                                  | C <sub>2</sub> H <sub>2</sub> F <sub>2</sub> <sup>+</sup> (P <sup>+</sup> ) 100 | Products not identified                                                           | C <sub>2</sub> HF <sub>3</sub> <sup>+</sup> (P <sup>+</sup> ) 98<br>CHF <sub>2</sub> <sup>+</sup> 2  | C <sub>2</sub> HF <sub>3</sub> <sup>+</sup> (P <sup>+</sup> ) 100                                    | C <sub>2</sub> F <sub>4</sub> <sup>+</sup> (P <sup>+</sup> ) 55<br>CF <sub>3</sub> <sup>+</sup> 38<br>CF <sup>+</sup> 7 | C <sub>2</sub> F <sub>4</sub> <sup>+</sup> (P <sup>+</sup> ) 100 <sup>g</sup> |
| <b>13.44 ((Xe<sup>+</sup>))</b>           | C <sub>2</sub> H <sub>2</sub> <sup>+</sup> 83<br>C <sub>2</sub> H <sub>3</sub> <sup>+</sup> 17 | C <sub>2</sub> H <sub>2</sub> <sup>+</sup> 25-100<br>C <sub>2</sub> H <sub>4</sub> <sup>+</sup> (P <sup>+</sup> ) 75-0                                            | C <sub>2</sub> H <sub>3</sub> F <sup>+</sup> (P <sup>+</sup> ) 96<br>CH <sub>2</sub> =CF <sup>+</sup> 2<br>C <sub>2</sub> H <sub>2</sub> <sup>+</sup> 2         | Reaction not studied                                                                                                                                                                                                                | C <sub>2</sub> H <sub>2</sub> F <sub>2</sub> <sup>+</sup> (P <sup>+</sup> ) 100 | Reaction not studied                                                              | C <sub>2</sub> HF <sub>3</sub> <sup>+</sup> (P <sup>+</sup> ) 100                                    | Reaction not studied                                                                                 | C <sub>2</sub> F <sub>4</sub> <sup>+</sup> (P <sup>+</sup> ) 100                                                        | Reaction not studied                                                          |
| <b>12.89 (N<sub>2</sub>O<sup>+</sup>)</b> | C <sub>2</sub> H <sub>4</sub> <sup>+</sup> (P <sup>+</sup> ) 100                               | No data available                                                                                                                                                 | C <sub>2</sub> H <sub>3</sub> F <sup>+</sup> (P <sup>+</sup> ) 100                                                                                              | C <sub>2</sub> H <sub>3</sub> F <sup>+</sup> (P <sup>+</sup> ) 100                                                                                                                                                                  | C <sub>2</sub> H <sub>2</sub> F <sub>2</sub> <sup>+</sup> (P <sup>+</sup> ) 100 | C <sub>2</sub> H <sub>2</sub> F <sub>2</sub> <sup>+</sup> (P <sup>+</sup> ) 100   | C <sub>2</sub> HF <sub>3</sub> <sup>+</sup> (P <sup>+</sup> ) 100                                    | C <sub>2</sub> HF <sub>3</sub> <sup>+</sup> (P <sup>+</sup> ) 100                                    | C <sub>2</sub> F <sub>4</sub> <sup>+</sup> (P <sup>+</sup> ) 100                                                        | C <sub>2</sub> F <sub>4</sub> <sup>+</sup> (P <sup>+</sup> ) 100              |
| <b>12.62 (H<sub>2</sub>O<sup>+</sup>)</b> | C <sub>2</sub> H <sub>4</sub> <sup>+</sup> (P <sup>+</sup> ) 100                               | C <sub>2</sub> H <sub>4</sub> <sup>+</sup> (P <sup>+</sup> ) 100                                                                                                  | C <sub>2</sub> H <sub>3</sub> F <sup>+</sup> (P <sup>+</sup> ) 100                                                                                              | Products not identified                                                                                                                                                                                                             | C <sub>2</sub> H <sub>2</sub> F <sub>2</sub> <sup>+</sup> (P <sup>+</sup> ) 100 | Data not collected                                                                | C <sub>2</sub> HF <sub>3</sub> <sup>+</sup> (P <sup>+</sup> ) 100                                    | Products not identified                                                                              | C <sub>2</sub> F <sub>4</sub> <sup>+</sup> (P <sup>+</sup> ) 100                                                        | C <sub>2</sub> F <sub>4</sub> <sup>+</sup> (P <sup>+</sup> ) 100              |
| <b>12.13 (Xe<sup>+</sup>)</b>             | C <sub>2</sub> H <sub>4</sub> <sup>+</sup> (P <sup>+</sup> ) 100                               | C <sub>2</sub> H <sub>4</sub> <sup>+</sup> (P <sup>+</sup> ) 100                                                                                                  | C <sub>2</sub> H <sub>3</sub> F <sup>+</sup> (P <sup>+</sup> ) 100                                                                                              | C <sub>2</sub> H <sub>3</sub> F <sup>+</sup> (P <sup>+</sup> ) 100                                                                                                                                                                  | C <sub>2</sub> H <sub>2</sub> F <sub>2</sub> <sup>+</sup> (P <sup>+</sup> ) 100 | C <sub>2</sub> H <sub>2</sub> F <sub>2</sub> <sup>+</sup> (P <sup>+</sup> ) 100   | C <sub>2</sub> HF <sub>3</sub> <sup>+</sup> (P <sup>+</sup> ) 100                                    | C <sub>2</sub> HF <sub>3</sub> <sup>+</sup> (P <sup>+</sup> ) 100                                    | C <sub>2</sub> F <sub>4</sub> <sup>+</sup> (P <sup>+</sup> ) 100                                                        | Reaction not studied                                                          |
| <b>12.07 (O<sub>2</sub><sup>+</sup>)</b>  | C <sub>2</sub> H <sub>4</sub> <sup>+</sup> (P <sup>+</sup> ) 100                               | C <sub>2</sub> H <sub>4</sub> <sup>+</sup> (P <sup>+</sup> ) 100                                                                                                  | C <sub>2</sub> H <sub>3</sub> F <sup>+</sup> (P <sup>+</sup> ) 100                                                                                              | C <sub>2</sub> H <sub>3</sub> F <sup>+</sup> (P <sup>+</sup> ) 100                                                                                                                                                                  | C <sub>2</sub> H <sub>2</sub> F <sub>2</sub> <sup>+</sup> (P <sup>+</sup> ) 100 | C <sub>2</sub> H <sub>2</sub> F <sub>2</sub> <sup>+</sup> (P <sup>+</sup> ) 100   | C <sub>2</sub> HF <sub>3</sub> <sup>+</sup> (P <sup>+</sup> ) 100                                    | C <sub>2</sub> HF <sub>3</sub> <sup>+</sup> (P <sup>+</sup> ) 100                                    | C <sub>2</sub> F <sub>4</sub> <sup>+</sup> (P <sup>+</sup> ) 100                                                        | C <sub>2</sub> F <sub>4</sub> <sup>+</sup> (P <sup>+</sup> ) 100              |
| <b>11.99 (SF<sub>4</sub><sup>+</sup>)</b> | C <sub>2</sub> H <sub>4</sub> <sup>+</sup> (P <sup>+</sup> ) 100                               | No data available                                                                                                                                                 | C <sub>2</sub> H <sub>3</sub> F <sup>+</sup> (P <sup>+</sup> ) 100                                                                                              | Products not identified                                                                                                                                                                                                             | C <sub>2</sub> H <sub>2</sub> F <sub>2</sub> <sup>+</sup> (P <sup>+</sup> ) 100 | C <sub>2</sub> H <sub>2</sub> F <sub>2</sub> <sup>+</sup> (P <sup>+</sup> ) 100   | C <sub>2</sub> HF <sub>3</sub> <sup>+</sup> (P <sup>+</sup> ) 100                                    | C <sub>2</sub> HF <sub>3</sub> <sup>+</sup> (P <sup>+</sup> ) 100                                    | C <sub>2</sub> F <sub>4</sub> <sup>+</sup> (P <sup>+</sup> ) 100                                                        | Reaction not studied                                                          |
| <b>11.36 (CF<sub>2</sub><sup>+</sup>)</b> | C <sub>2</sub> H <sub>4</sub> <sup>+</sup> (P <sup>+</sup> ) 100                               | C <sub>3</sub> H <sub>3</sub> F <sub>2</sub> <sup>+</sup> 55<br>C <sub>2</sub> H <sub>4</sub> <sup>+</sup> (P <sup>+</sup> ) 45                                   | C <sub>2</sub> H <sub>3</sub> F <sup>+</sup> (P <sup>+</sup> ) 100                                                                                              | C <sub>2</sub> H <sub>3</sub> F <sup>+</sup> (P <sup>+</sup> ) 88<br>CH <sub>2</sub> =CH <sup>+</sup> 12                                                                                                                            | C <sub>2</sub> H <sub>2</sub> F <sub>2</sub> <sup>+</sup> (P <sup>+</sup> ) 100 | C <sub>2</sub> H <sub>2</sub> F <sub>2</sub> <sup>+</sup> (P <sup>+</sup> ) 100   | C <sub>2</sub> HF <sub>3</sub> <sup>+</sup> (P <sup>+</sup> ) 100                                    | C <sub>2</sub> HF <sub>3</sub> <sup>+</sup> (P <sup>+</sup> ) 100                                    | C <sub>2</sub> F <sub>4</sub> <sup>+</sup> (P <sup>+</sup> ) 100                                                        | C <sub>2</sub> F <sub>4</sub> <sup>+</sup> (P <sup>+</sup> ) 100              |
| <b>10.31 (SF<sup>+</sup>)</b>             | Below IE(C <sub>2</sub> H <sub>4</sub> )                                                       | No data available                                                                                                                                                 | Below IE(C <sub>2</sub> H <sub>3</sub> F)                                                                                                                       | Products not identified                                                                                                                                                                                                             | C <sub>2</sub> H <sub>2</sub> F <sub>2</sub> <sup>+</sup> (P <sup>+</sup> ) 100 | C <sub>2</sub> H <sub>2</sub> F <sub>2</sub> <sup>+</sup> (P <sup>+</sup> ) 100 ? | C <sub>2</sub> HF <sub>3</sub> <sup>+</sup> (P <sup>+</sup> ) 100                                    | C <sub>2</sub> HF <sub>3</sub> <sup>+</sup> (P <sup>+</sup> ) 100                                    | C <sub>2</sub> F <sub>4</sub> <sup>+</sup> (P <sup>+</sup> ) 100                                                        | Reaction not studied                                                          |
| <b>10.24 (SF<sub>2</sub><sup>+</sup>)</b> | Below IE(C <sub>2</sub> H <sub>4</sub> )                                                       | No data available                                                                                                                                                 | Below IE(C <sub>2</sub> H <sub>3</sub> F)                                                                                                                       | No reaction <sup>l</sup>                                                                                                                                                                                                            | Below IE(C <sub>2</sub> H <sub>2</sub> F <sub>2</sub> )                         | No reaction                                                                       | C <sub>2</sub> HF <sub>3</sub> <sup>+</sup> (P <sup>+</sup> ) 100                                    | No reaction                                                                                          | C <sub>2</sub> F <sub>4</sub> <sup>+</sup> (P <sup>+</sup> ) 100                                                        | Reaction not studied                                                          |

|                                                     |                                          |                                                                                                                             |                                           |                                                                                                                                                                                                                                                                                                                                 |                                                         |                                                                                                                                                                                |                                           |                                                                                                                    |                                                                  |                                                                                                                                                       |
|-----------------------------------------------------|------------------------------------------|-----------------------------------------------------------------------------------------------------------------------------|-------------------------------------------|---------------------------------------------------------------------------------------------------------------------------------------------------------------------------------------------------------------------------------------------------------------------------------------------------------------------------------|---------------------------------------------------------|--------------------------------------------------------------------------------------------------------------------------------------------------------------------------------|-------------------------------------------|--------------------------------------------------------------------------------------------------------------------|------------------------------------------------------------------|-------------------------------------------------------------------------------------------------------------------------------------------------------|
| 10.11 (C <sub>2</sub> F <sub>4</sub> <sup>+</sup> ) | Below IE(C <sub>2</sub> H <sub>4</sub> ) | C <sub>2</sub> H <sub>2</sub> F <sub>2</sub> <sup>+</sup> 95<br>C <sub>3</sub> H <sub>3</sub> F <sub>2</sub> <sup>+</sup> 5 | Below IE(C <sub>2</sub> H <sub>3</sub> F) | C <sub>2</sub> H <sub>3</sub> F <sup>+</sup> (P <sup>+</sup> ) 45<br>C <sub>3</sub> H <sub>3</sub> F <sub>2</sub> <sup>+</sup> 40<br>C <sub>3</sub> H <sub>2</sub> F <sub>3</sub> <sup>+</sup> 10<br>C <sub>2</sub> H <sub>2</sub> F <sub>2</sub> <sup>+</sup> 3<br>C <sub>4</sub> H <sub>3</sub> F <sub>5</sub> <sup>+</sup> 2 | Below IE(C <sub>2</sub> H <sub>2</sub> F <sub>2</sub> ) | C <sub>4</sub> H <sub>2</sub> F <sub>6</sub> <sup>+</sup> 60<br>C <sub>3</sub> H <sub>2</sub> F <sub>3</sub> <sup>+</sup> 30<br>C <sub>3</sub> HF <sub>4</sub> <sup>+</sup> 10 | Below IE(C <sub>2</sub> HF <sub>3</sub> ) | C <sub>2</sub> HF <sub>3</sub> <sup>+</sup> (P <sup>+</sup> ) 72<br>C <sub>3</sub> HF <sub>4</sub> <sup>+</sup> 28 | C <sub>2</sub> F <sub>4</sub> <sup>+</sup> (P <sup>+</sup> ) 100 | C <sub>3</sub> F <sub>5</sub> <sup>+</sup> 100 <sup>h</sup>                                                                                           |
| 9.78 (SF <sub>3</sub> <sup>+</sup> )                | Below IE(C <sub>2</sub> H <sub>4</sub> ) | No data available                                                                                                           | Below IE(C <sub>2</sub> H <sub>3</sub> F) | Products not identified                                                                                                                                                                                                                                                                                                         | Below IE(C <sub>2</sub> H <sub>2</sub> F <sub>2</sub> ) | SF <sub>3</sub> <sup>+</sup> 53<br>C <sub>2</sub> H <sub>2</sub> F <sub>3</sub> <sup>+</sup> 32<br>C <sub>2</sub> H <sub>2</sub> F <sub>2</sub> <sup>+</sup> 15                | Below IE(C <sub>2</sub> HF <sub>3</sub> ) | No reaction                                                                                                        | Below IE(C <sub>2</sub> F <sub>4</sub> )                         | Reaction not studied                                                                                                                                  |
| 9.26 (NO <sup>+</sup> )                             | Below IE(C <sub>2</sub> H <sub>4</sub> ) | No data available                                                                                                           | Below IE(C <sub>2</sub> H <sub>3</sub> F) | No reaction                                                                                                                                                                                                                                                                                                                     | Below IE(C <sub>2</sub> H <sub>2</sub> F <sub>2</sub> ) | No reaction                                                                                                                                                                    | Below IE(C <sub>2</sub> HF <sub>3</sub> ) | No reaction                                                                                                        | Below IE(C <sub>2</sub> F <sub>4</sub> )                         | Reaction not studied                                                                                                                                  |
| 9.11 (CF <sup>+</sup> )                             | Below IE(C <sub>2</sub> H <sub>4</sub> ) | CH <sub>2</sub> F <sup>+</sup> 80<br>C <sub>3</sub> H <sub>3</sub> <sup>+</sup> 20                                          | Below IE(C <sub>2</sub> H <sub>3</sub> F) | CH <sub>2</sub> =CH <sup>+</sup> 88<br>CHF <sub>2</sub> <sup>+</sup> 12                                                                                                                                                                                                                                                         | Below IE(C <sub>2</sub> H <sub>2</sub> F <sub>2</sub> ) | CF <sub>3</sub> <sup>+</sup> 88<br>C <sub>2</sub> H <sub>2</sub> F <sup>+</sup> 7<br>CHF <sub>2</sub> <sup>+</sup> 5                                                           | Below IE(C <sub>2</sub> HF <sub>3</sub> ) | CF <sub>3</sub> <sup>+</sup> 100                                                                                   | Below IE(C <sub>2</sub> F <sub>4</sub> )                         | CF <sub>3</sub> <sup>+</sup> 65<br>C <sub>3</sub> F <sub>5</sub> <sup>+</sup> 32<br>C <sub>2</sub> F <sub>4</sub> <sup>+</sup> 4 (?)                  |
| 9.09 (CF <sub>3</sub> <sup>+</sup> )                | Below IE(C <sub>2</sub> H <sub>4</sub> ) | C <sub>3</sub> H <sub>3</sub> F <sub>2</sub> <sup>+</sup> 60<br>CH <sub>2</sub> =CH <sup>+</sup> 40                         | Below IE(C <sub>2</sub> H <sub>3</sub> F) | CH <sub>2</sub> =CH <sup>+</sup> 75<br>CHF <sub>2</sub> <sup>+</sup> 25                                                                                                                                                                                                                                                         | Below IE(C <sub>2</sub> H <sub>2</sub> F <sub>2</sub> ) | C <sub>2</sub> H <sub>2</sub> F <sup>+</sup> 50<br>C <sub>3</sub> H <sub>2</sub> F <sub>5</sub> <sup>+</sup> 44<br>C <sub>3</sub> HF <sub>4</sub> <sup>+</sup> 6               | Below IE(C <sub>2</sub> HF <sub>3</sub> ) | C <sub>3</sub> HF <sub>6</sub> <sup>+</sup> 100                                                                    | Below IE(C <sub>2</sub> F <sub>4</sub> )                         | C <sub>3</sub> F <sub>7</sub> <sup>+</sup> 94<br>C <sub>3</sub> F <sub>5</sub> <sup>+</sup> 4 (?)<br>C <sub>2</sub> F <sub>3</sub> <sup>+</sup> 2 (?) |
| 8.32 (SF <sub>3</sub> <sup>+</sup> )                | Below IE(C <sub>2</sub> H <sub>4</sub> ) | No data available                                                                                                           | Below IE(C <sub>2</sub> H <sub>3</sub> F) | No reaction                                                                                                                                                                                                                                                                                                                     | Below IE(C <sub>2</sub> H <sub>2</sub> F <sub>2</sub> ) | No reaction                                                                                                                                                                    | Below IE(C <sub>2</sub> HF <sub>3</sub> ) | No reaction                                                                                                        | Below IE(C <sub>2</sub> F <sub>4</sub> )                         | Reaction not studied                                                                                                                                  |
| 6.27 (H <sub>3</sub> O <sup>+</sup> )               | Below IE(C <sub>2</sub> H <sub>4</sub> ) | C <sub>2</sub> H <sub>5</sub> <sup>+</sup> 65<br>C <sub>2</sub> H <sub>7</sub> O <sup>+</sup> 35                            | Below IE(C <sub>2</sub> H <sub>3</sub> F) | C <sub>2</sub> H <sub>4</sub> F <sup>+</sup> 100                                                                                                                                                                                                                                                                                | Below IE(C <sub>2</sub> H <sub>2</sub> F <sub>2</sub> ) | C <sub>2</sub> H <sub>3</sub> F <sub>2</sub> <sup>+</sup> 100                                                                                                                  | Below IE(C <sub>2</sub> HF <sub>3</sub> ) | No data collected                                                                                                  | Below IE(C <sub>2</sub> F <sub>4</sub> )                         | Reaction not studied                                                                                                                                  |

- a) Data from experiment [46] and statistical modelling [52]
- b) Data from [35]
- c) Data from [4-7,10-21]
- d) This work
- e) Data from [3,8,9]
- f) Data from [54]
- g) Data from [8]
- h) Data from [9]
- j)  $k_{exp} < 10^{-13} \text{ cm}^3 \text{ molecule}^{-1} \text{ s}^{-1}$

Note that the reference numbers used in (a) – (j) are the same as in the main paper.
